# Supplementary material for: Role of C/EBP-α in Adriamycin-induced podocyte injury
Source: PubMed Central journal article supplement (PMC5028749; doi:10.1038/srep33520), 2016-09-20
Supplement: srep33520-s1.pdf [file srep33520-s1.pdf]

# Supplementary Figures

## Role of C/EBP- $\alpha$ in Adriamycin-induced podocyte injury

Fang Zhong<sup>1, 2</sup>, Weiming Wang<sup>1 \*</sup>, Kyung Lee<sup>2</sup>, John Cijiang He<sup>2 \*</sup> and Nan Chen<sup>1</sup>

<sup>1</sup> Institute of Nephrology, Shanghai Jiaotong University School of Medicine, Shanghai, China

<sup>2</sup> Division of Nephrology, Department of Medicine, Icahn School of Medicine at Mount Sinai, New York, NY

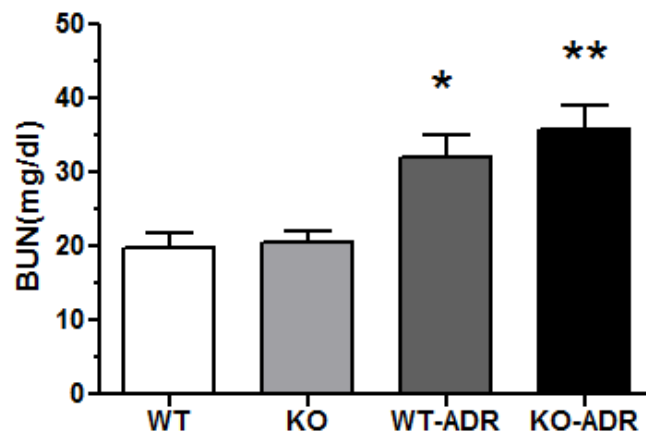

### Supplementary Figure 1: Decreasing renal function in WT-ADR and KO-ADR mice

Renal function of mice in each group were assessed using the blood urea nitrogen (BUN) analysis on serum samples obtained 4 weeks post injection of vehicle or ADR (n = 6, \*p <0.05, \*\*p <0.01 vs WT and KO).

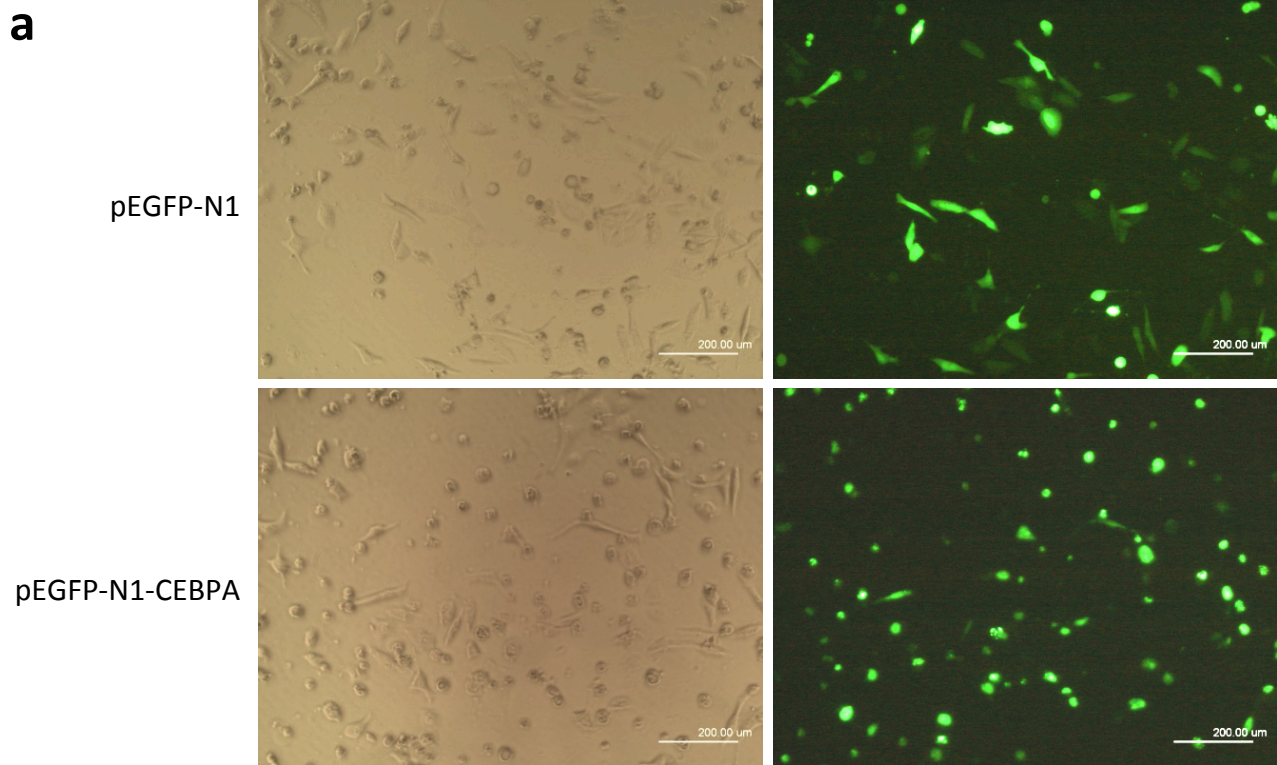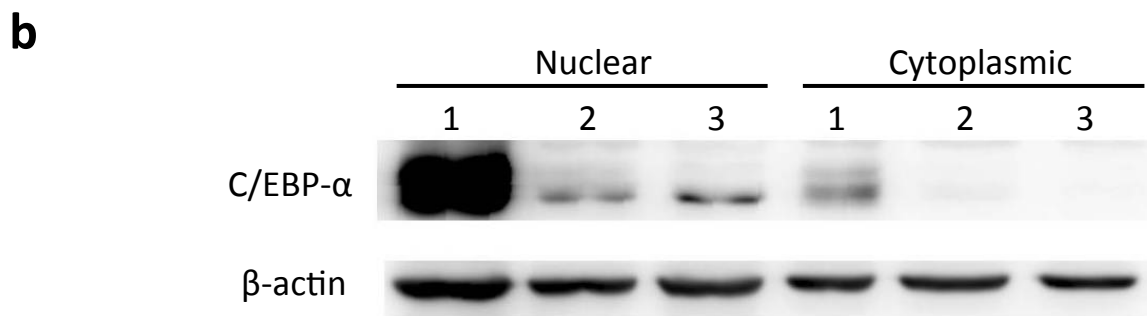

**Supplementary Figure 2: Expression of C/EBP- $\alpha$  in human podocytes**

(A) 70-80% of enhanced green fluorescent protein (EGFP) expression was confirmed with phase contrast bright-field (left panels) and epi-fluorescence (right panels) microscopy in podocytes transfected with either pEGFP-N1-CEBPA plasmid (Top) or with pEGFP-N1 control plasmid (Bottom). (B) Confirmation of C/EBP- $\alpha$  expression in nucleus and cytoplasm fractions of transfected podocytes by western blot analysis. Analysis of nuclear and cytoplasmic fractions of podocytes expressing C/EBP $\alpha$ -EGFP (1), EGFP (2), or untransfected (3) are shown.  $\beta$ -actin was used as a loading control.

## Supplementary Table 1: Primer sequences for real-time PCR

| Gene                   | Forward                                      | Reverse                                      |
|------------------------|----------------------------------------------|----------------------------------------------|
| <i>CEBPA1F (Xho I)</i> | 5'-ATCATCCTCGAGATGGAGTCGGCCGACTT-CTACGAGG-3' | 5'-ATCATCGGATCCCGCGCGCAGTTGCCCATG-GCCTTGC-3' |
| <i>Gapdh</i>           | 5'-AGCACCAGACCACAGGTGA-3'                    | 5'-GAGGGTGTCGTAGGTGATGC-3'                   |
| <i>Cebp-a</i>          | 5'-TGGCCTGGAGACGCA ATGA-3'                   | 5'-CGCAGAGATTGTGCGTCTTT-3'                   |
| <i>Nphs1</i>           | 5'-GTGCCCTGAAGGACCCTACT-3'                   | 5'-CCTGTGGATCCCTTTGACAT-3'                   |
| <i>Nphs2</i>           | 5'-CTTGGCACATCGATCCCTCA-3'                   | 5'-CGCACTTTGGCCTGTCTTTG-3'                   |
| <i>Wt1</i>             | 5'-GAGAGCCAGCCTACCATCC-3'                    | 5'-GGGTCCTCGTGTTTGAAGGAA-3'                  |
| <i>GAPDH</i>           | 5'-CAGGGCTGCTTTTAACTCTGGTAA-3'               | 5'-GGGTGGAATCATATTGGAACATGT-3'               |
| <i>MCP-1</i>           | 5'-CAGCCAGATGCAATCAATGC-3'                   | 5'-GTGGTCCATGGAATCCTGAA-3'                   |
| <i>IL-6</i>            | 5'-GCACCTCAGATTGTTGTTG-3'                    | 5'-AAATAGTGCCTAACGCTCATAC-3'                 |
